# Supplementary material
Source: HighWire-hosted journal article supplement (https://jnis.bmj.com/content/15/8/771)
Supplement: inline-supplementary-material-1 [file inline-supplementary-material-1.pdf]

**SUPPLEMENTAL MATERIAL**

**Clinical Experience With the Bendit Steerable Microcatheter: A New Paradigm for Endovascular Treatment**

**Supplementary Table 1: Procedural Characteristics**

| Patient | Patient age and details                                  | Indication                                                                                                       | Target vessel(s)                           | Procedural details                                                                                                     | Guidewire used | Contrast applied through the Bendit? | Device used                                                                              | Device delivered successfully with Bendit | Procedure time (min) |
|---------|----------------------------------------------------------|------------------------------------------------------------------------------------------------------------------|--------------------------------------------|------------------------------------------------------------------------------------------------------------------------|----------------|--------------------------------------|------------------------------------------------------------------------------------------|-------------------------------------------|----------------------|
| 1       | 60s; dyslipidemia                                        | Epistaxis nasal vessel embolization: Nosebleeds due to genetic disease (OWR syndrome)                            | ECA branches, right ECA                    | Embolization of right ECA; right ECA embolized with 0.3 mL Magic Glue (25%)                                            | Yes            | Yes                                  | NA                                                                                       | NA                                        | 121                  |
| 2       | 70s; baseline mRS: 0                                     | Supraclinoid aneurysm (5 x 5.5 mm) following previous FD catheterization                                         | ICA-intracranial                           | Inserted flow diverter inside previous Pipeline device in right ICA; good outcome; procedure failed to deliver Silk FD | Yes            | NA                                   | Silk Vista 4.5 x 15 mm                                                                   | No                                        | 69                   |
| 3       | 40s; baseline mRS: 0                                     | AVM/Fistula: right-cheek AVM                                                                                     | Other: ECA-internal maxillary artery       | Embolization with 0.2 mL of PHIL DMSO (25%)                                                                            | No             | NA                                   | NA                                                                                       | NA                                        | 84                   |
| 4       | 80s; NIHSS score: 12                                     | Stroke                                                                                                           | ICA-extracranial                           | Stroke treatment not achieved due to highly tortuous arch take off vessels                                             | Yes            | NA                                   | NA                                                                                       | NA                                        | 133                  |
| 5       | 60s, Hypertension                                        | Aneurysm                                                                                                         | Left M1                                    | Complete aneurysm repair, intrasaccular device                                                                         | Yes            | NA                                   | Contour 9mm                                                                              | Yes                                       | 66                   |
| 6       | 70s; dyslipidemia; neurological disease; baseline mRS: 0 | Carotid aneurysm (4.4 x 3.8 mm) with previous history of cavernous carotid fistula previously treated with coils | CC, ICA-extracranial                       | Aneurysm coiled                                                                                                        | NA             | Yes                                  | LVIS stent 4.5x18<br>LVIS stent 4.5x23<br>Hydrosoft10 coil 4x10<br>Hydrosoft10 coil 3x10 | Yes<br>Yes<br>Yes<br>Yes                  | 60                   |
| 7       | 40s; hypertension; baseline mRS: 0                       | A1 aneurysm (5 x 7 mm) previously treated with Phenox contour flow modulation                                    | A1, CC, ICA-intracranial, ICA-extracranial | Complete aneurysm repair, intrasaccular device                                                                         | NA             | Yes                                  | Contour 9mm                                                                              | Yes                                       | 73                   |

|    |                                                                                         |                                                                                                       |                                                                          |                                                                             |    |     |                                     |                 |     |
|----|-----------------------------------------------------------------------------------------|-------------------------------------------------------------------------------------------------------|--------------------------------------------------------------------------|-----------------------------------------------------------------------------|----|-----|-------------------------------------|-----------------|-----|
| 8  | 60s; hypertension; dyslipidemia; previous stroke; neurological disease; baseline mRS: 0 | Basilar aneurysm (5 x 5 mm)                                                                           | Basilar, vertebral                                                       | Contour device deployed                                                     | NA | NA  | Contour 7mm                         | Yes             | 73  |
| 9  | 40s; hypertension; ACI; neurological disease; double vision; baseline mRS: 0            | Side-wall aneurysm (3.0 x 2.9 mm)                                                                     | ICA-intracranial                                                         | Contour device deployed                                                     | NA | NA  | Contour 5mm                         | Yes             | 65  |
| 10 | 50s; hypertension, hypercholesterolemia; neurological disease; baseline mRS: 0          | Diagnostic angiography to evaluate previous treatment of ophthalmic embolization with a flow diverter | ICA-intracranial                                                         | Diagnostic indication for ICA-intracranial region                           | NA | NA  | NA                                  | NA              | 61  |
| 11 | 50s; hypertension; hypercholesterolemia; neurological disease; baseline mRS: 0          | Ophthalmic aneurysm; recurring blister (2.5 x 1.5 mm)                                                 | ICA-intracranial                                                         | Treated with flow diverter                                                  | NA | NA  | Fred Flow Diverter 4.0x12/18mm      | NA              | 54  |
| 12 | 60s; baseline mRS: 0                                                                    | Diagnostic procedure to identify source of bleeding through contrast injections                       | Other: Costocervical trunk                                               | Diagnostic; target vessels: vertebral and ICA-extracranial                  | NA | Yes | NA                                  | NA              | 100 |
| 13 | 60s; baseline mRS: 0                                                                    | ACOM aneurysm (7 x 5 mm); severe elongated and tortuous vessels                                       | ACOM                                                                     | Four different types of coils deployed; two Contour devices; 2 Bendits used | NA | NA  | Coils<br>Contour 9mm<br>Contour 7mm | NA<br>Yes<br>NA | 125 |
| 14 | 60s; CAD; baseline mRS: 0                                                               | Diagnostic                                                                                            | P1, ECA-branches, ICA-extracranial, ICA-intracranial, vertebral, basilar | Diagnostic, target vessels: vertebral, basilar, P1                          | NA | Yes | NA                                  | NA              | 79  |

|    |                                                                                                     |                                                                                                                           |                                        |                                                                                                                                                                                                                             |     |     |                                                                 |            |     |
|----|-----------------------------------------------------------------------------------------------------|---------------------------------------------------------------------------------------------------------------------------|----------------------------------------|-----------------------------------------------------------------------------------------------------------------------------------------------------------------------------------------------------------------------------|-----|-----|-----------------------------------------------------------------|------------|-----|
| 15 | 70s; hypertension; neurological disease; baseline mRS: 0                                            | Cavernous aneurysm (17.1 x 22.3 mm)                                                                                       | ICA-intracranial                       | Partial embolism of aneurysm with flow diverter                                                                                                                                                                             | Yes | NA  | Fred flow diverter 4.5x39/45mm                                  | NA         | 100 |
| 16 | 60s; hypertension; previous stroke; neurological disease; baseline mRS:0                            | 60-70% right ICA stenosis with ulceration                                                                                 | CC, ICA-extracranial                   | Casper carotid stent system                                                                                                                                                                                                 | Yes | NA  | Casper stent 9x40                                               | NA         | 47  |
| 17 | 30s; neurological disease; SAH; baseline mRS=0                                                      | Two aneurysms: right MCA and right ACOM                                                                                   | M1, ICA-intracranial, ICA-extracranial | Two intrasaccular devices                                                                                                                                                                                                   | NA  | Yes | Contour CNS21005-15<br>Contour CNS21009-15                      | Yes<br>Yes | 67  |
| 18 | 50s; hypertension; neurological disease; previous stroke; baseline mRS: 3                           | Basilar aneurysm (6.69 x 7.52 mm)                                                                                         | Vertebral, basilar                     | Flow diverter and intrasaccular device; Contour device did not pass Bendit luer to shaft                                                                                                                                    | Yes | NA  | Silk Vista 4.5x25<br>Contour CNS21009-15                        | NA<br>No   | 93  |
| 19 | 70s; hypertension; neurological disease; previous TIA; baseline mRS: 0                              | Carotid stenosis                                                                                                          | CC, ICA-extracranial                   | Casper carotid stent system, passing ICA stenosis with Bendit                                                                                                                                                               | NA  | NA  | Casper Carotid Stent System 9x30x143                            | NA         | 60  |
| 20 | 60s; hypertension; COPD; baseline mRS: 0                                                            | ACOM aneurysm (6 x 5 mm)                                                                                                  | A1, ICA-extracranial, ICA-intracranial | Intrasaccular device                                                                                                                                                                                                        | NA  | NA  | Contour CNS21007-15                                             | Yes        | 71  |
| 21 | 70s; hypertension; neurological disease; previous stroke; male reproductive cancer; baseline mRS: 0 | ICA stenosis                                                                                                              | ICA-extracranial; ICA-intracranial     | Casper stent                                                                                                                                                                                                                | NA  | NA  | Casper 7x30x143                                                 | NA         | 72  |
| 22 | 60s; baseline mRS: 0                                                                                | AVM/fistula: left type 3 dural fistula with arterial inflows from the ophthalmic artery and the internal maxillary artery | Other: cortical vein                   | Bendit inserted over a guidewire to access dorsal vein, replaced with Apollo 2 and Sonic, Second Bendit (same catheter) used to successfully access ophthalmic artery; injection with PHIL (25%) coil insertion to minimize | Yes | Yes | Coil Finish Barricade 3mm/8cm<br>Coil Finish Barricade 4mm/10cm | NA<br>NA   | 194 |

|    |                                                                                                            |                                                                         |                                                     |                                                                                                                                                                                                                                                                                                      |     |    |                                                                                  |                        |         |
|----|------------------------------------------------------------------------------------------------------------|-------------------------------------------------------------------------|-----------------------------------------------------|------------------------------------------------------------------------------------------------------------------------------------------------------------------------------------------------------------------------------------------------------------------------------------------------------|-----|----|----------------------------------------------------------------------------------|------------------------|---------|
|    |                                                                                                            |                                                                         |                                                     | reflux; fistula completely closed                                                                                                                                                                                                                                                                    |     |    |                                                                                  |                        |         |
| 23 | 60s; baseline mRS: 0                                                                                       | Aneurysm (6 x 4 mm) of the left cerebral artery at the temporal branch  | MCA                                                 | Balloon-assisted coiling of aneurysm; LEO Baby stent                                                                                                                                                                                                                                                 | Yes | NA | LEO Baby Stent 2.5x12<br>Hydrocoil10 4x8<br>Hydrocoil10 2x4<br>Hydrocoil10 1.5x2 | NA<br>NA<br>NA<br>NA   | 116     |
| 24 | 70s; hypertension, hypercholesterolemia; ICA stenosis; previous TIA; neurological disease; baseline mRS: 0 | Aneurysm (7.6 mm max diameter); stenosis of right common carotid artery |                                                     | High-grade ACI outlet stenosis probed with Transend; stenting and PTA balloon. Ascended with Bendit over guidewire; then removed guidewire and accessed aneurysm. Delivered 2 of 4 coils with Bendit and replaced the Echelon and complete embolization; jammed coil following delivery of two coils | Yes | NA | Hydrocoil10 6x20<br>Hydrocoil10 5x20<br>Hydrocoil10 4x10<br>Hydrocoil10 6x20     | Yes<br>No<br>Yes<br>No | 90      |
| 25 | 60s; hypertension; baseline mRS: 1                                                                         | Angioplasty                                                             | High-grade kink stenosis caused by a migrated stent | Stenosis probed using Bendit microcatheter on a Traxcess microwire                                                                                                                                                                                                                                   | Yes | NA | Stent                                                                            | NA                     | Unknown |

\*Treating physician did not define as device failure.

ACI=acute cerebral infarction; CAD=coronary artery disease; TIA=transient ischemic attack; OWR=Osler-Weber-Rendu syndrome; FD=flow diverter; AVM=arteriovenous malformation; ECA=external carotid artery; ICA=internal carotid artery; CC=common carotid artery; ACOM=anterior communicating artery; DMSO=dimethyl sulfoxide; PTA=percutaneous transluminal angioplasty; mRS=modified Rankin Scale.

## Supplemental Table 2: Continued

Supplementary Table 2: Questionnaire results

| ID | Ability to deliver a guidewire through Bendit 21 | Ability to deliver Bendit 21 through guiding catheter | Ability to deliver deliverables through Bendit 21 | Ability to advance distal part of Bendit 21 | Ability to shape (deflect) distal tip of Bendit 21 | Responsiveness to rotation of Bendit 21 | Sustaining position during material/device delivery | Visibility of catheter body | Visibility of tip marker | Visibility of proximal marker | Ability to steer and lock using steering slider |
|----|--------------------------------------------------|-------------------------------------------------------|---------------------------------------------------|---------------------------------------------|----------------------------------------------------|-----------------------------------------|-----------------------------------------------------|-----------------------------|--------------------------|-------------------------------|-------------------------------------------------|
| 1  | 5                                                | 5                                                     | 5                                                 | 5                                           | 5                                                  | 5                                       | 1                                                   | 5                           | 5                        | 5                             | 5                                               |
| 2  | 5                                                | 5                                                     | 1                                                 | 1                                           | 5                                                  | 5                                       | 1                                                   | 5                           | 5                        | 5                             | 5                                               |
| 3  | NA                                               | 5                                                     | NA                                                | 4                                           | 3                                                  | 4                                       | 1                                                   | 5                           | 5                        | 4                             | 4                                               |
| 4  | 5                                                | 5                                                     | NA                                                | 5                                           | 5                                                  | 5                                       | 1                                                   | 5                           | 5                        | 5                             | 5                                               |
| 5  | 5                                                | 5                                                     | 5                                                 | 4                                           | 3                                                  | NA                                      | 5                                                   | 5                           | 5                        | 5                             | 4                                               |
| 6  | NA                                               | 5                                                     | 5                                                 | 5                                           | 5                                                  | 5                                       | NA                                                  | 4                           | 5                        | 5                             | 5                                               |
| 7  | NA                                               | 5                                                     | 5                                                 | 5                                           | 5                                                  | 5                                       | NA                                                  | 5                           | 5                        | 5                             | 5                                               |
| 8  | NA                                               | 5                                                     | 5                                                 | 5                                           | 5                                                  | 5                                       | NA                                                  | 5                           | 5                        | 5                             | 5                                               |
| 9  | NA                                               | 5                                                     | 5                                                 | 5                                           | 5                                                  | 5                                       | NA                                                  | 5                           | 5                        | 5                             | NA                                              |
| 10 | NA                                               | 5                                                     | NA                                                | 5                                           | 5                                                  | 5                                       | 1                                                   | 5                           | 5                        | 5                             | NA                                              |
| 11 | NA                                               | 5                                                     | NA                                                | 5                                           | 5                                                  | 5                                       | NA                                                  | 5                           | 5                        | 5                             | NA                                              |
| 12 | NA                                               | 5                                                     | 5                                                 | 5                                           | 5                                                  | 5                                       | 1                                                   | 5                           | 5                        | 5                             | NA                                              |
| 13 | NA                                               | 5                                                     | NA                                                | 5                                           | 3                                                  | 3                                       | NA                                                  | 5                           | 5                        | 5                             | NA                                              |
| 14 | NA                                               | 5                                                     | 5                                                 | 5                                           | 5                                                  | 5                                       | 1                                                   | 5                           | 5                        | 5                             | NA                                              |
| 15 | 5                                                | 5                                                     | NA                                                | 4                                           | 4                                                  | 4                                       | 1                                                   | 4                           | 4                        | 4                             | 2                                               |
| 16 | 5                                                | 5                                                     | NA                                                | 5                                           | 5                                                  | 5                                       | NA                                                  | 5                           | 5                        | 5                             | 5                                               |
| 17 | NA                                               | 5                                                     | 5                                                 | 5                                           | 5                                                  | 5                                       | NA                                                  | 5                           | 5                        | 5                             | 5                                               |
| 18 | 5                                                | 5                                                     | 1                                                 | 5                                           | 5                                                  | 5                                       | 1                                                   | 5                           | 5                        | 5                             | 5                                               |
| 19 | 5                                                | 5                                                     | NA                                                | 5                                           | 5                                                  | 5                                       | 1                                                   | 5                           | 5                        | 5                             | NA                                              |
| 20 | NA                                               | 5                                                     | 5                                                 | 5                                           | 5                                                  | NA                                      | 1                                                   | 5                           | 5                        | 5                             | 5                                               |
| 21 | 5                                                | 5                                                     | NA                                                | 5                                           | 5                                                  | 5                                       | NA                                                  | 5                           | 5                        | 5                             | NA                                              |
| 22 | 5                                                | 5                                                     | 5                                                 | 5                                           | 5                                                  | 5                                       | NA                                                  | 5                           | 5                        | 5                             | 5                                               |
| 23 | 5                                                | 5                                                     | NA                                                | 4                                           | 1                                                  | 1                                       | 1                                                   | 5                           | 5                        | 5                             | 1                                               |
| 24 | 5                                                | 5                                                     | 5                                                 | 5                                           | 5                                                  | 5                                       | NA                                                  | 5                           | 5                        | -                             | NA                                              |
| 25 | 5                                                | 5                                                     | NA                                                | 5                                           | 5                                                  | 5                                       | 1                                                   | 5                           | 5                        | 5                             | 5                                               |

User satisfaction: 1=very complicated to use; 2=complicated to use; 3=neutral; 4=slightly complicated to use; 5=easy to use. NA=Not Applicable

User definitions: 1=very complicated to use/training is needed before using the device; 2=more complicated than similar devices on the market; 3=neutral; 4=slightly complicated/one or two steps are not easy; 5=all steps including device preparation were intuitive/easy.

| ID | Ability to use the torque button | Ability to deliver contrast | Ability to deliver mechanical devices | Ease of retraction of the Bendit 21 | How useful did you find the Bendit 21 | General impression of performance and ease of use | Mean Response | Based on your experience following the use with Bendit 21, did the procedure take less time? | Would you use the Bendit 21 again in future procedures? |
|----|----------------------------------|-----------------------------|---------------------------------------|-------------------------------------|---------------------------------------|---------------------------------------------------|---------------|----------------------------------------------------------------------------------------------|---------------------------------------------------------|
| 1  | 5                                | 5                           | NA                                    | 5                                   | 3                                     | 5                                                 | 4.6           | Cannot evaluate                                                                              | Yes                                                     |
| 2  | 5                                | NA                          | 1                                     | 5                                   | 1                                     | 1                                                 | 3.5           | Cannot evaluate                                                                              | Yes                                                     |
| 3  | 3                                | 5                           | NA                                    | 5                                   | 5                                     | 5                                                 | 4.1           | No                                                                                           | Yes                                                     |
| 4  | NA                               | NA                          | NA                                    | 5                                   | 4                                     | 5                                                 | 4.6           | Cannot evaluate                                                                              | Yes                                                     |
| 5  | NA                               | NA                          | NA                                    | 5                                   | 3                                     | 3                                                 | 4.4           | No                                                                                           | Yes                                                     |
| 6  | 4                                | 5                           | 5                                     | 5                                   | 5                                     | 4                                                 | 4.8           | Yes                                                                                          | Yes                                                     |
| 7  | 5                                | 5                           | 5                                     | 5                                   | 5                                     | 5                                                 | 5.0           | Yes                                                                                          | Yes                                                     |
| 8  | 5                                | NA                          | 5                                     | 5                                   | 5                                     | 5                                                 | 5.0           | Yes                                                                                          | Yes                                                     |
| 9  | 5                                | NA                          | 5                                     | 5                                   | 5                                     | 5                                                 | 5.0           | Yes                                                                                          | Yes                                                     |
| 10 | NA                               | NA                          | NA                                    | 5                                   | 5                                     | 5                                                 | 4.6           | Yes                                                                                          | Yes                                                     |
| 11 | 5                                | NA                          | NA                                    | 5                                   | 5                                     | 5                                                 | 5.0           | Yes                                                                                          | Yes                                                     |
| 12 | NA                               | 5                           | NA                                    | 5                                   | 5                                     | 5                                                 | 4.7           | Yes                                                                                          | Yes                                                     |
| 13 | 5                                | NA                          | 5                                     | 5                                   | 5                                     | 5                                                 | 4.7           | No                                                                                           | Yes                                                     |
| 14 | 5                                | 5                           | NA                                    | 5                                   | 5                                     | 5                                                 | 4.7           | Yes                                                                                          | Yes                                                     |
| 15 | 4                                | NA                          | NA                                    | 5                                   | 5                                     | 5                                                 | 4.0           | Yes                                                                                          | Yes                                                     |
| 16 | NA                               | NA                          | NA                                    | 5                                   | 5                                     | 5                                                 | 5.0           | Yes                                                                                          | Yes                                                     |
| 17 | NA                               | NA                          | NA                                    | 5                                   | 5                                     | 5                                                 | 5.0           | Yes                                                                                          | Yes                                                     |
| 18 | NA                               | NA                          | 1                                     | 5                                   | 5                                     | 5                                                 | 4.2           | Cannot evaluate                                                                              | Yes                                                     |
| 19 | NA                               | NA                          | NA                                    | 5                                   | 5                                     | 5                                                 | 4.7           | Yes                                                                                          | Yes                                                     |
| 20 | NA                               | NA                          | 5                                     | 5                                   | 5                                     | 5                                                 | 4.7           | Yes                                                                                          | Yes                                                     |
| 21 | NA                               | NA                          | NA                                    | 5                                   | 5                                     | 5                                                 | 5.0           | Yes                                                                                          | Yes                                                     |
| 22 | 5                                | 5                           | NA                                    | 5                                   | 5                                     | 5                                                 | 5.0           | Yes                                                                                          | Yes                                                     |
| 23 | 1                                | NA                          | NA                                    | 5                                   | 1                                     | -                                                 | 3.1           | No                                                                                           | No                                                      |
| 24 | NA                               | NA                          | 5                                     | 5                                   | 5                                     | 5                                                 | 5.0           | Yes                                                                                          | Yes                                                     |
| 25 | 5                                | -                           | NA                                    | 1                                   | 5                                     | 5                                                 | 4.4           | Yes                                                                                          | Yes                                                     |

User satisfaction: 1=very complicated to use; 2=complicated to use; 3=neutral; 4=slightly complicated to use; 5=easy to use.

User definitions: 1=very complicated to use/training is needed before using the device; 2=more complicated than similar devices on the market; 3=neutral; 4=slightly complicated/one or two steps are not easy; 5=all steps including device preparation were intuitive/easy.

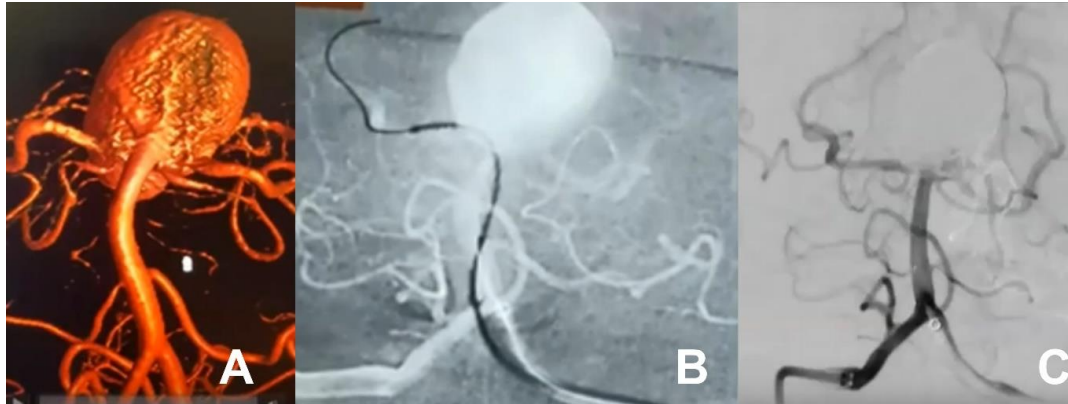

**Supplementary Figure 1:** Using the Bedit21 to coil a giant basilar tip aneurysm. A) The giant wide-necked basilar tip aneurysm (2.3 cm x 2.7 cm). Both posterior cerebral arteries (PCAs) originated from the aneurysmal sac. B) The Bedit21 used to advance a 0.014-inch Synchro 2 guidewire into the distal right P3. C) The treated aneurysm after embolization with 25 coils. Flow was preserved in the bilateral PCAs and superior cerebral arteries.



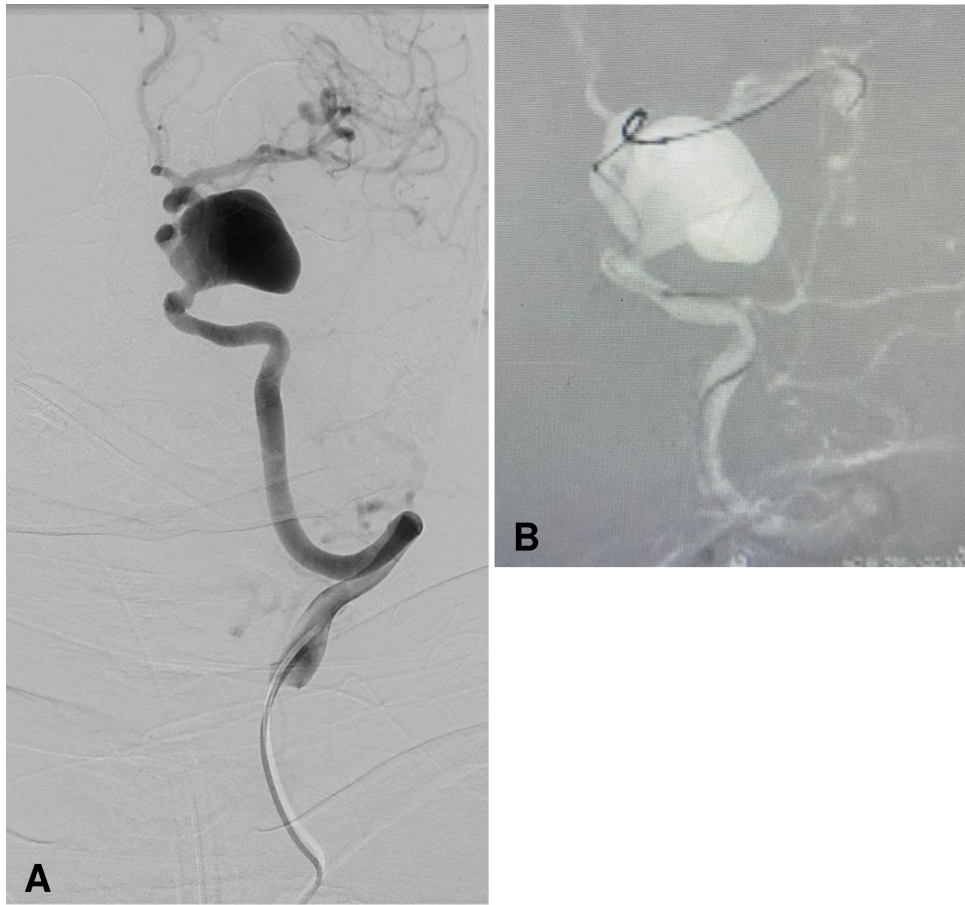

**Supplementary Figure 2:** A) Intra-procedural angiogram showing giant cavernous internal carotid artery aneurysm, with Bendit catheterization. B) Bendit21 crossing the aneurysm.

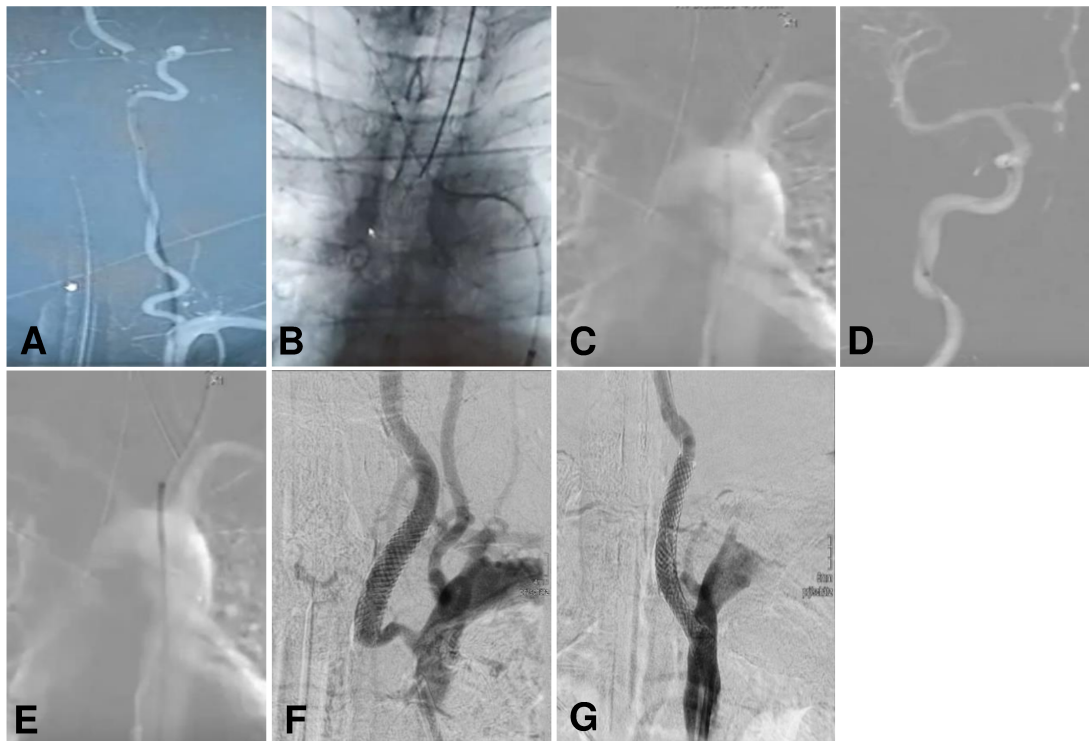

**Supplementary Figure 3:** The use of the Bendit21 to catheterize vasculature without a guidewire (A–D). The Bendit21 used to catheterize (A) the left vertebral artery (B), the right common carotid artery (C), the left common carotid artery (D), and the anterior cerebral artery. E) The Bendit21 acting as a scaffold for larger devices. F) Left vertebral artery stenosis with a displaced stent after deployment. The proximal stent was anchored into the arterial wall, making catheterization difficult. G) Using the Bendit21 and a 14-inch guidewire, a second stent was telescoped and deployed.

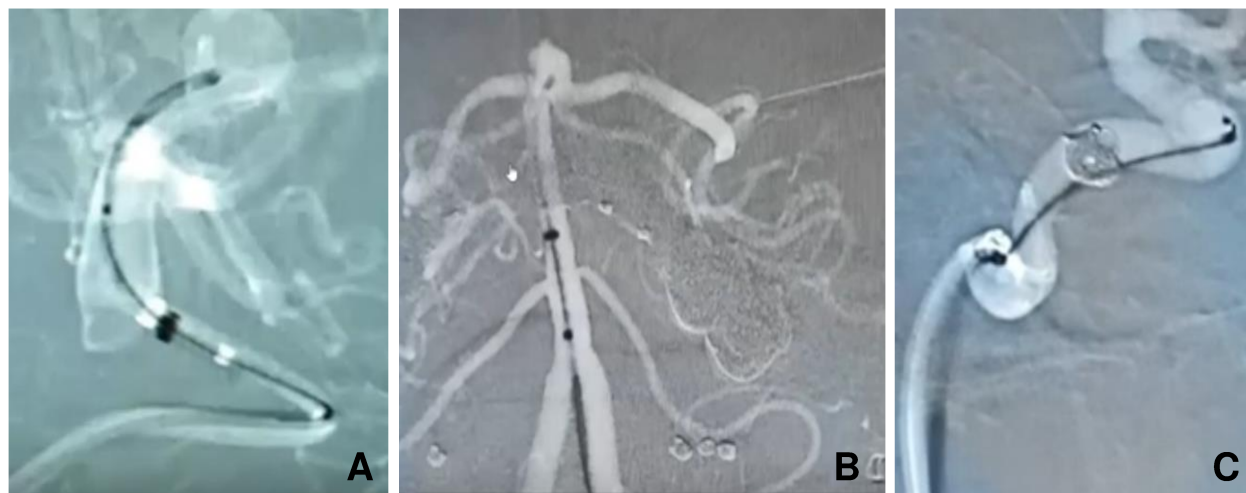

**Supplementary Figure 4:** The Bendit21 used to deploy the Contour Neurovascular System in three different aneurysms without a guidewire. A) Bendit delivers a 9-mm Contour device in an aneurysm of the ACOM artery (5 x 7 mm) with a broad neck (Patient 7 in **Supplementary Table 1**). B) AP view of Bendit remaining in a stable position while the 7-mm Contour device was deployed in a basilar aneurysm (5 x 5 mm) (Patient 8). C) Lateral view of the 5-mm Contour device being deployed in a wall aneurysm (3.0 x 2.9 mm) in the carotid artery (Patient 9). The stiff intrasaccular device does not move the Bendit.

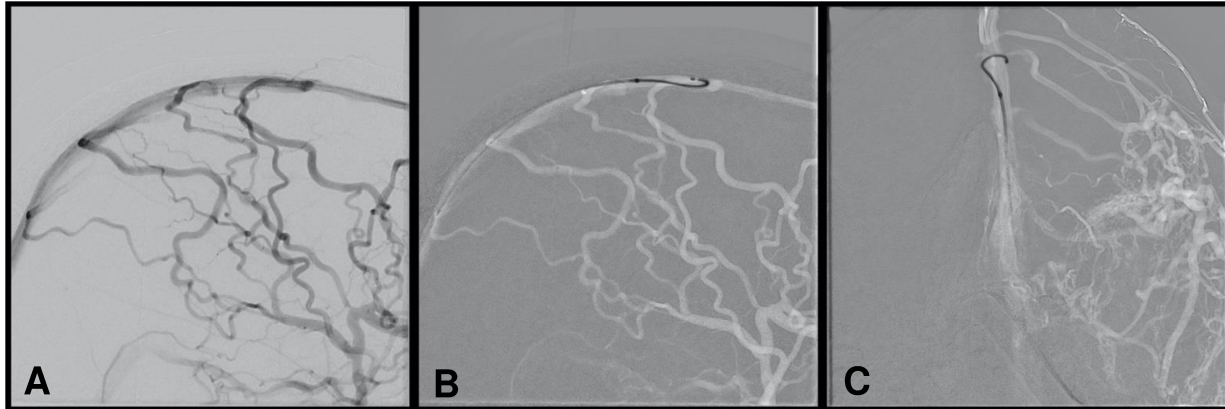

**Supplementary Figure 5:** Transvenous navigation in Patient 22. A) Pre-procedure angiography showing the cortical vein, lateral view. B) Bedit21 catheterizing the cortical vein as it enters the superior sagittal sinus, followed by a microguidewire for exchange. C) Frontal view.
